# Supplementary material for: Donated Blood Screening for HIV, HCV and HBV by ID-NAT and the Residual Risk of Iatrogenic Transmission in a Tertiary Care Hospital Blood Bank in Puebla, Mexico
Source: MDPI journal article supplement (doi:10.3390/v15061331), 2023-06-06
Supplement: s1 [file s1]

**Table S1.** Blood donors with more than one marker during the study periods

| <b>2012-2015</b>         |                 |              |                 |            |            |            |                     |
|--------------------------|-----------------|--------------|-----------------|------------|------------|------------|---------------------|
| <b>Serological tests</b> |                 |              |                 | <b>NAT</b> |            |            | <b>Number of DB</b> |
| <i>Anti-HIV/p24</i>      | <i>Anti-HCV</i> | <i>HBsAg</i> | <i>Anti-HBc</i> | <i>HIV</i> | <i>HCV</i> | <i>HBV</i> | -                   |
| R                        | R               | NR           | R               | P          | N          | P          | 1                   |
| R                        | NR              | NR           | R               | P          | N          | N          | 3                   |
| NR                       | R               | R            | NR              | N          | P          | N          | 1                   |
| NR                       | R               | NR           | R               | N          | P          | N          | 1                   |
| Total                    |                 |              |                 |            |            |            | 6                   |

  

| <b>2017-2019</b>         |                 |              |                 |            |            |            |                     |
|--------------------------|-----------------|--------------|-----------------|------------|------------|------------|---------------------|
| <b>Serological tests</b> |                 |              |                 | <b>NAT</b> |            |            | <b>Number of DB</b> |
| <i>Anti-HIV/p24</i>      | <i>Anti-HCV</i> | <i>HBsAg</i> | <i>Anti-HBc</i> | <i>HIV</i> | <i>HCV</i> | <i>HBV</i> | -                   |
| R                        | NR              | NR           | R               | P          | N          | N          | 2                   |
| R                        | NR              | NR           | R               | N          | N          | P          | 1                   |
| R                        | NR              | NR           | R               | P          | N          | N          | 4                   |
| NR                       | R               | NR           | R               | N          | N          | N          | 3                   |
| R                        | R               | NR           | R               | P          | N          | N          | 2                   |
| NR                       | NR              | R            | R               | N          | P          | P          | 1                   |
| NR                       | NR              | R            | R               | N          | P          | N          | 7                   |
| Total                    |                 |              |                 |            |            |            | 20                  |

R – reactive; NR – nonreactive; P – positive; N- negative.
