# Supplementary material for: Donated Blood Screening for HIV, HCV and HBV by ID-NAT and the Residual Risk of Iatrogenic Transmission in a Tertiary Care Hospital Blood Bank in Puebla, Mexico
Source: MDPI journal article supplement (doi:10.3390/v15061331), 2023-06-06
Supplement: s1 [file s1]

**Table S2.** Seroprevalence in blood donors reported by other studies carried out in México during the period covered by the study 2012-2015 and 2017- 2019.

| Reference                      | Rojo-Medina et al.  | Robles-Martínez et al. | Hernández-Romano et al. | Navarrete-Castro et al. | Portillo-García et al. | Aguirre-Orozco et al. | González-Santos et al. | Guerrero-García et al. | Prevalence mean (CI 95%) |
|--------------------------------|---------------------|------------------------|-------------------------|-------------------------|------------------------|-----------------------|------------------------|------------------------|--------------------------|
| Year of publication            | 2017                | 2016                   | 2016                    | 2017                    | 2018                   | 2019                  | 2019                   | 2021                   |                          |
| Study period                   | 2012                | 2014                   | 2014-2015               | 2012-2015               | 2017-2018              | 2015-2018             | 2016-2019              | 2018-2019              |                          |
| Blood bank                     | CETS, IMSS, private | CETS                   | CETS                    | ISSSTE                  | CETS                   | CETS                  | IMSS                   | IMSS                   |                          |
| Federal entity                 | National            | Jalisco                | Veracruz                | CdMx                    | Chihuahua              | Jalisco               | Nuevo León             | Jalisco                |                          |
| Number of BD                   | 1,782,890           | 133,393                | 9,817                   | 36,793                  | 41,387                 | 36,065                | 188,705                | 80,391                 |                          |
| Prevalence serological markers |                     |                        |                         |                         |                        |                       |                        |                        |                          |
| Combo anti-HIV/ p24Ag N (P)    | TNIS                | 133 (0.10)             | TNIS                    | 67 (0.18)               | 56 (0.13)              | 350 (0.10)            | 214 (0.11)             | 152 (0.19)             | 0.13 (0.092-0.16)        |
| Anti-HCV N (P)                 | 10,217 (0.57)       | 760 (0.57)             | TNIS                    | 180 (0.49)              | TNIS                   | 153 (0.43)            | 918 (0.48)             | 385 (0.48)             | 0.50 (0.44-0.56)         |
| HBsAg N (P)                    | 2,675 (0.15)        | 160 (0.12)             | 21 (0.22)               | 42 (0.11)               | TNIS                   | 57 (0.15)             | 256 (0.13)             | 181 (0.22)             | 0.15 (0.11-0.20)         |
| Anti-HBc N (P)                 | TNIS                | TNIS                   | 1.13 (1.15) - 1.17      | TNIS                    | TNIS                   | TNIS                  | TNIS                   | TNIS                   |                          |

Prevalence of serological test in BD reported by other studies carried out in México during the period covered by the study 2012-2019. CETS = State Blood Transfusion Centers (Jalisco); IMSS= Mexican Social Security Institute (Jalisco and Nuevo León); ISSSTE= Institute of Social Security and Services of State Workers (Mexico City); TNIS=test not included in the study; N (P) = number (prevalence).

## References

- Rojo-Medina, J.; Bello-López, J. M., National prevalence of hepatitis C and B viruses in Mexican blood donors, 2000–2012. *Revista Médica del Hospital General de México* 2017, 80, (1), 37-44.
- Robles Martínez, A. K.; Becerra Leyva, M. G.; Licón González, G. E., Seroprevalencia de marcadores infecciosos en los servicios de Medicina Transfusional Públicos e Institucionales del Estado de Jalisco durante 2014. *Rev Mex Med Transfus* 2016, 8, (Supl. 1), S15.
- Hernández-Romano, P. A.; Bravo-Sarmiento, E.; López-Balderas, N. A., Hepatitis B oculta en donadores del CETS-Veracruz. *Rev Mex Med Tran* 2016, 9, (1-2), 9.
- Navarrete-Castro, J.; Siria Torreblanca, N.; Lebrija Córdova, V.; Carmona García, R.; De la Fuente Dorado, L.; González Avante, M., Prevalencia de agentes infecciosos transmisibles en donadores de hemocomponentes del Banco de Sangre del CMN «20 de Noviembre», ISSSTE Juan Navarrete Castro. *Rev Mex Med Transfus* 2017, 10, (Supl. 1), S5-S6.
- Portillo García, M. L.; López Lom, D.; Cuevas Aguilar, C. J.; Lerma Arias, C. Y.; Grijalva Saavedra, G., Prevalencia de VIH en donadores de la Secretaría de Salud del estado de Chihuahua. *Rev Mex Med Transfus* 2018, 2018, (11), Supl. 1.

- Aguirre-Orozco, A.; Estrada-Mendoza, M. G.; Rodríguez-González, G. A.; Corona-Alfaro, R. A.; Vargas-Carretero, C., Prevalencia de seropositividad en donadores aptos de componentes sanguíneos en el Banco de Sangre del nuevo Hospital Civil de Guadalajara “Dr Juan I Menchaca” en el período comprendido 2015-2018. *Rev Mex Med Transfus* 2019, 12, (Supl. 1), S7-S8.
- González Santos, M. A.; Solano Ricardi, M. M.; Saldaña Vázquez, R., Importancia de la prueba NAT en la seguridad transfusional de los donadores de Banco de Sangre en la UMAE Hospital de Cardiología No. 34. *Rev Mex Med Transfus* 2019, 12, (Supl. 1), S5.
- Guerrero-García, J. J.; Zuniga-Magana, A. G.; Barrera-De Leon, J. C.; Magana-Duarte, R.; Ortuno-Sahagun, D., Retrospective Study of the Seroprevalence of HIV, HCV, and HBV in Blood Donors at a Blood Bank of Western Mexico. *Pathogens* 2021, 10, (7).
